# Supplementary material
Source: publisher site journal article supplement (https://e-cmh.org/upload/media/cmh-2024-0060-Supplementary-Table-2.pdf)
Supplement: Supplementary file 1 [file cmh-2024-0060-Supplementary-Table-2.pdf]

**Supplementary Table 2.** Primer sequences used in this study

| Primer          | Forward 5' to 3'         | Reverse 5' to 3'       |
|-----------------|--------------------------|------------------------|
| CIITA           | CACTGCAGGACACGTATGG      | CGACATAGAGTCCCGTGAGC   |
| CIITA-Real time | AGTGATCGGTGAGAGTATGGA    | GGAGCAGTCGCTCACTG      |
| HNF4 $\alpha$   | GAGTGGGCCAAGTACATCCCAG   | GCTTTGAGGTAGGCATACT    |
| HNF1 $\alpha$   | AGGTCTTCACCTCAGACACTG    | AGCGACAGTCCCTCCTACAT   |
| HNF3 $\beta$    | AAGATGGAAGGGCACGAGC      | TGTACGTGTTTCATGCCGTTCA |
| C/EBP $\alpha$  | CCTTGTGCAATGTGAATGTGC    | CGGAGAGTCTCATTTTGGCAA  |
| HBx             | AAAAAGTTGCATGGTGTGGTGAAC | GCGCGGGACGTACTTTGT     |
| GAPDH           | ATCATCCCTGCCTCTACTGG     | TGGGTGTCGCTGTTGAAGTC   |
| HBV DNA         | CTCGTGGTGGACTTCTCTC      | CTGCAGGATGAAGAGGAA     |
